# Supplementary material for: Impedance spectroscopy-based cell/particle position detection in microfluidic systems
Source: Royal Society of Chemistry journal article supplement (doi:10.1039/c6lc01223j), 2017-01-01
Supplement: c6lc01223j1.pdf [file c6lc01223j1.pdf]

## Electronic Supplementary Information

### Impedance spectroscopy-based cell/particle position detection in microfluidic systems

**H. Wang,<sup>a§</sup> N. Sobahi<sup>b§</sup> and A. Han<sup>b,c,d</sup>**

§ These authors contributed equally.

<sup>a</sup> Department of Biomedical Engineering, School of Medicine, Tsinghua University, China.

<sup>b</sup> Department of Electrical and Computer Engineering, Texas A&M University,  
College Station, TX, 77843, USA.

<sup>c</sup> Department of Biomedical Engineering, Texas A&M University,  
College Station, TX, 77843, USA.

<sup>d</sup> Center for Remote Healthcare Technology and Systems (CRHTS), Texas A&M University,  
College Station, TX, 77843, USA.

\*Correspondence should be addressed to Arum Han (arum.han@ece.tamu.edu).

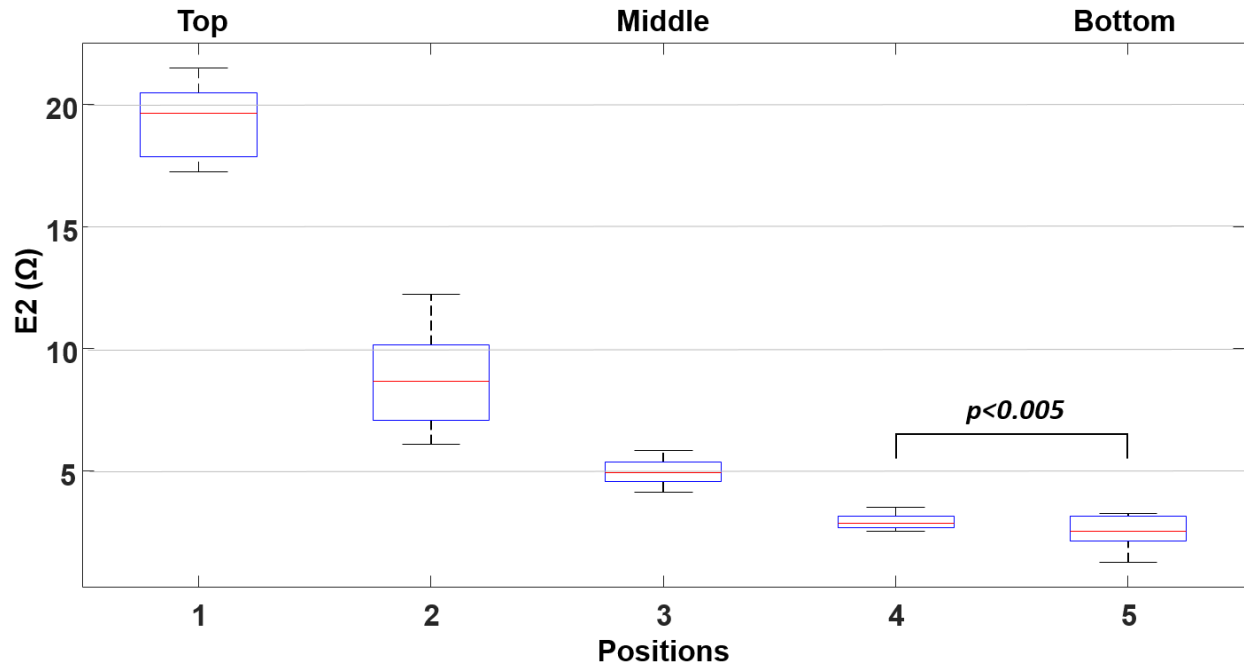

**Fig. S1** The detected impedance peak amplitude at five different transverse positions using beads of 6  $\mu\text{m}$  diameter. The peak amplitude signals are significantly different from position to position. The applied excitation signal condition was 3 V at 27 MHz.

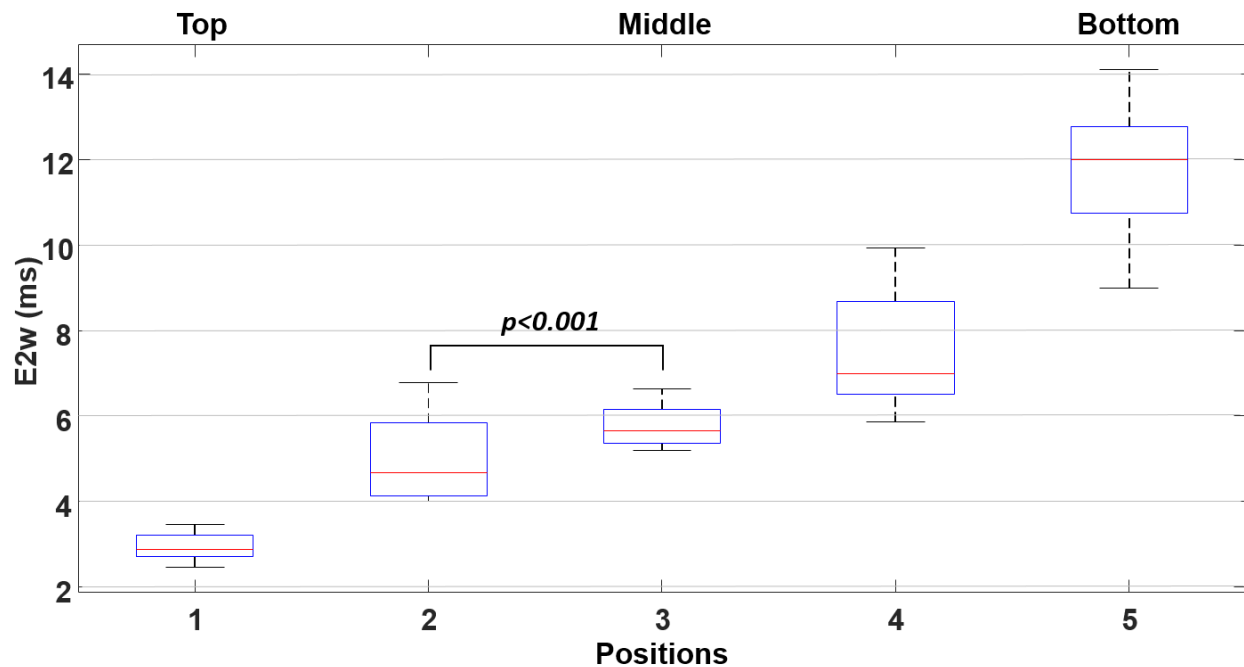

**Fig. S2** The detected impedance peak width at five different transverse positions using beads of 6  $\mu\text{m}$  diameter. The peak width signals are significantly different from position to position.
